# Supplementary material
Source: PubMed Central journal article supplement (PMC3635736)
Supplement: JCI66397sd.pdf [file JCI66397sd.pdf]

# Supplemental Figure 1

WT B6 Saline

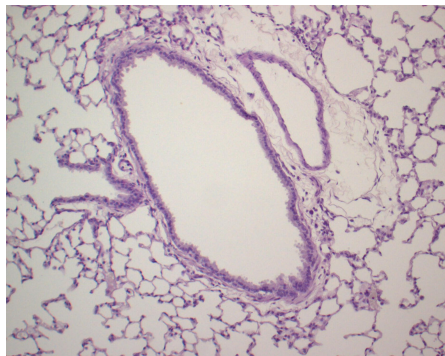

*Ptprj*<sup>TM-/TM-</sup> B6 Saline

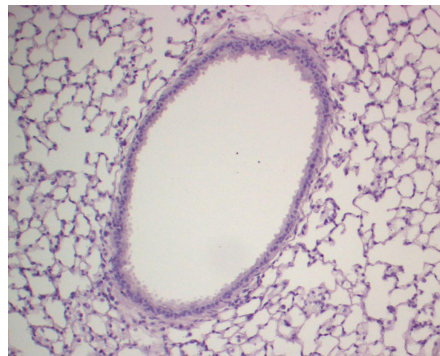

WT B6 OVA

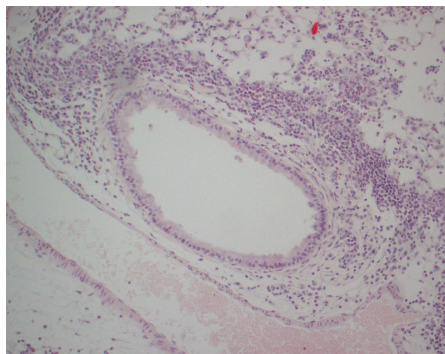

*Ptprj*<sup>TM-/TM-</sup> B6 OVA

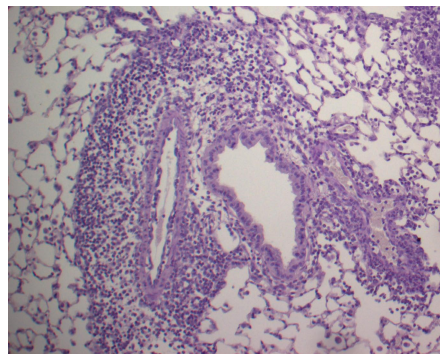

WT Balb/c Saline

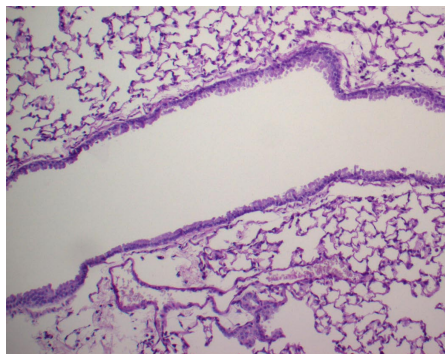

*Ptprj*<sup>TM-/TM-</sup> Balb Saline

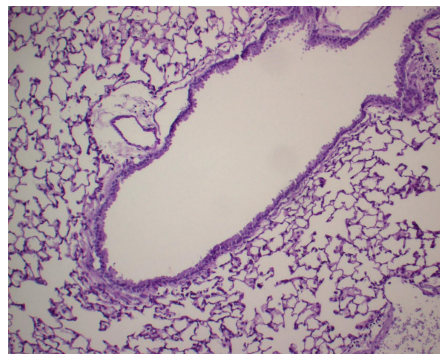

WT Balb/c OVA

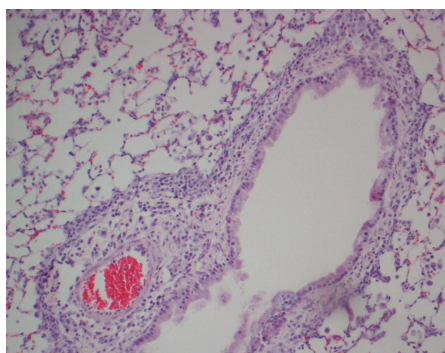

*Ptprj*<sup>TM-/TM-</sup> Balb OVA

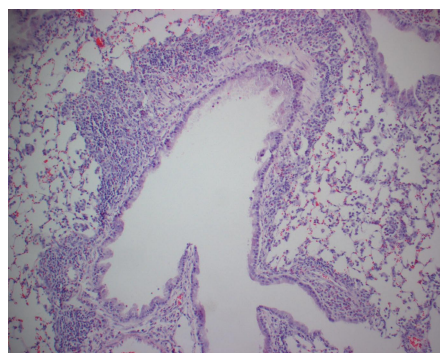

**Supplemental Figure 1.** Hematoxylin and eosin staining of lungs from mice sensitized and intranasally challenged with OVA peptide. 100x magnification.

# Supplemental Figure 2

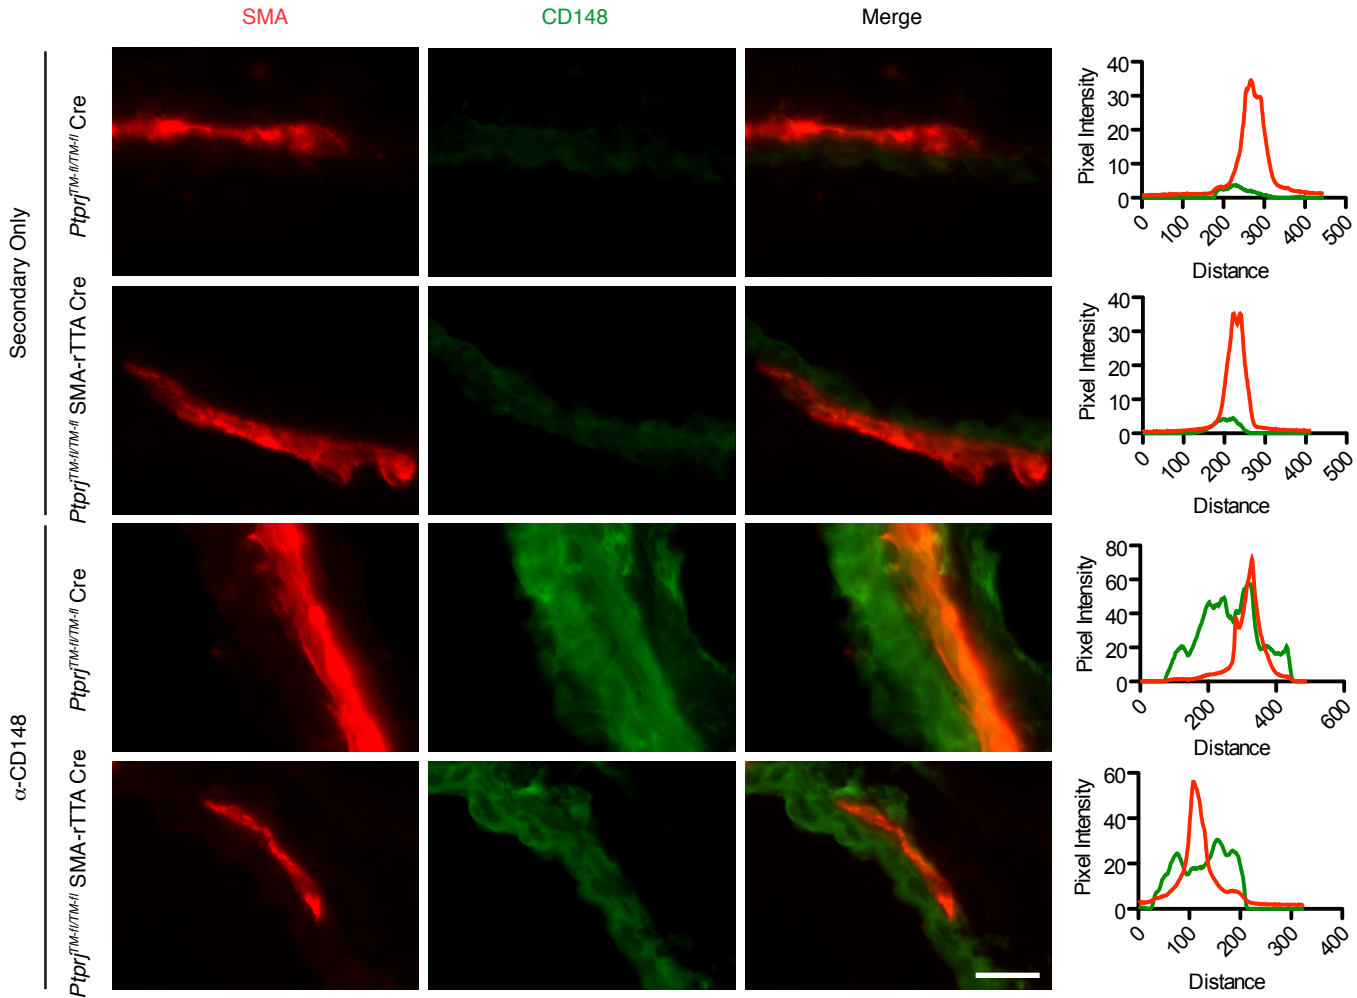

**Supplemental Figure 2. Partial deletion of CD148 from airway smooth muscle.** Immunofluorescence staining of mouse lung bronchi with primary antibody to CD148 (8A-1) and secondary goat-anti-hamster Alexa488 antibody. Anti-smooth muscle actin (SMA) conjugated to Cy3 was used to stain airway smooth muscle. Right column shows quantitative Image J analysis of line scans. Scale bar: 50  $\mu$ m.
